# Supplementary material for: Adaptive Radiation within Marine Anisakid Nematodes: A Zoogeographical Modeling of Cosmopolitan, Zoonotic Parasites
Source: PLoS One. 2011 Dec 13;6(12):e28642. doi: 10.1371/journal.pone.0028642 (PMC3236750; doi:10.1371/journal.pone.0028642)
Supplement: Table S1 — Information on parasites sampling locations and hosts. Sampling locations of the 373 anisakid nematodes used for molecular analyses including abbreviation (Abb.), host and sample size (n). Asterisks mark multiple sampling sites with the same abbreviation (see Figure S1). (XLS) [file pone.0028642.s003.xls]

## Sheet: Tabelle1
Sample location	Abb.	Host	n	∑
Alaska (Bay Nushagak)	AlaB	Oncorhynchus keta	12	23
		Oncorhynchus nerka	11
Alaska (Cordova)	AlaC	Oncorhynchus keta	12	24
		Oncorhynchus nerka	12
Antarctica (South Shetland Islands)	Ant	Gymnoscopelus nicholsi	14	14
Azores	Azo	Etmopterus spinax	5	49
		Etmopterus pusillus	9
		Etmopterus princeps	23
		Deania profundorum	12
Baltic Sea (Kattegat)	Bal*	Scomber scombrus	2	13
		Clupea harengus	11
Baltic Sea (off Kiel)	Bal*	Clupea harengus	9	9
Barents Sea (Bellsund Banks)	BS*	Melanogrammus aeglifinus	13	24
		Micromesistius poutassou	11
Barents Sea (Björnöya)	BS*	Gadus morhua	2	2
Barents Sea (Forland Banks)	BS*	Micromesistius poutassou	9	9
Barents Sea (Sjubre Banks)	BS*	Melanogrammus aeglifinus	12	12
China	Chi	Scomberomorus niphonius	3	27
		Cleisthenes herzensteinii	7
		Gadus macrocephalus	6
		Trichiurus lepturus	11
Hawaii	Haw	Cololabis sp.	5	12
		Selar crumenophtalmus	6
		Katsuwonus pelamys	1
Indonesia	Ind	Trichiurus lepturus	26	49
		Auxis thazard thazard	5
		Auxis rochei rochei	15
		Lepturacanthus savala	2
		Caesio cuning	1
Italy (Ionian Sea)	Ion	Merluccius merluccius	10	10
Italy (Tyrrhenian Sea)	Tyr	Scomber japonicus	3	3
Madeira	Mad	Aphanopus carbo	16	16
Namibia	Nam	Synapobranchus kaupii	1	1
Moorea	Moo	Katsuwonus pelamys	3	4
		Selar crumenophtalmus	1
North Sea (off Scheveningen)	NSS	Trachurus trachurus	8	28
		Scomber scombrus	20
North Sea (off German Coast)	NSG	Clupea harengus	40	40
St. Barbara	Bar	Anoplopoma fimbria	3	4
		Sebastolobus alascanus	1
			∑	373
